# Supplementary material
Source: PubMed Central journal article supplement (PMC3963438)
Supplement: am405531n_si_001.pdf [file am405531n_si_001.pdf]

## Fluorescent Boronic Acid Polymer Grafted on Silica Particles for Affinity Separation of Saccharides

Zhifeng Xu,<sup>†,‡,§</sup> Khan Mohammad Ahsan Uddin,<sup>†</sup> Tripta Kamra,<sup>†,#</sup> Joachim Schnadt,<sup>#</sup> Lei Ye<sup>†\*</sup>

<sup>†</sup> Division of Pure and Applied Biochemistry, Lund University, Box 124, 221 00 Lund, Sweden

<sup>‡</sup> Department of Chemistry and Material Science, Hengyang Normal University, Hengyang, Hunan 421008, China

<sup>§</sup> Key Laboratory of Functional Organometallic Materials, College of Hunan Province, Hengyang, Hunan 421008, China

<sup>#</sup> Division of Synchrotron Radiation Research, Lund University, Box 118, 221 00 Lund, Sweden

### 1. Solid state <sup>11</sup>B MAS NMR

Si@poly(APBA-PA) particles were packed into a 4 mm ZrO MAS rotor for the solid state NMR analysis. The <sup>11</sup>B MAS NMR spectrum was obtained by spinning the rotor at 12 kHz in a 500 MHz instrument, using a quadrupole echo sequence without <sup>1</sup>H decoupling.

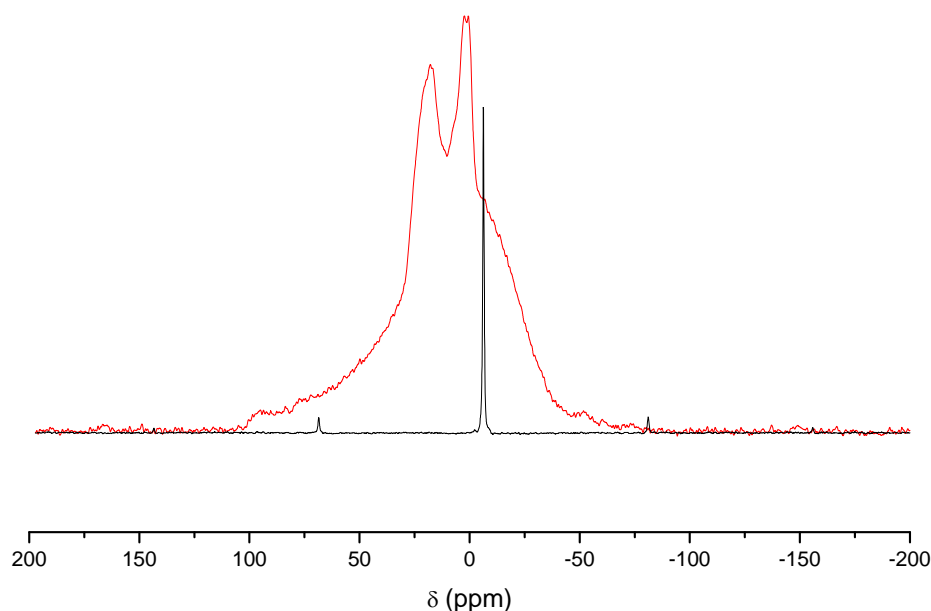

**Figure S1.** <sup>11</sup>B MAS NMR spectrum of Si@poly(APBA-PA) (red) and sodium tetraphenylborate (black).

## 2. XPS analysis

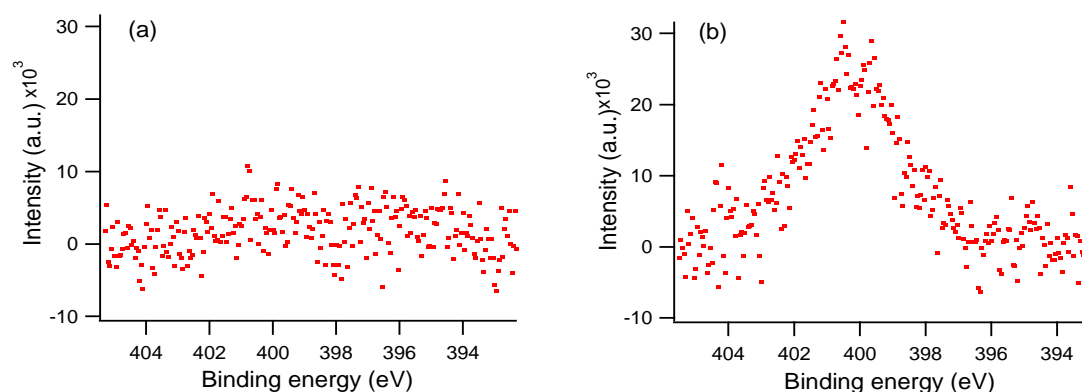

**Figure S2.** Particle characterization by XPS. N 1s spectrum of Si@initiator (a) and Si@poly(APBA-PA) (b).

## 3. UV-Vis analysis of ARS solution

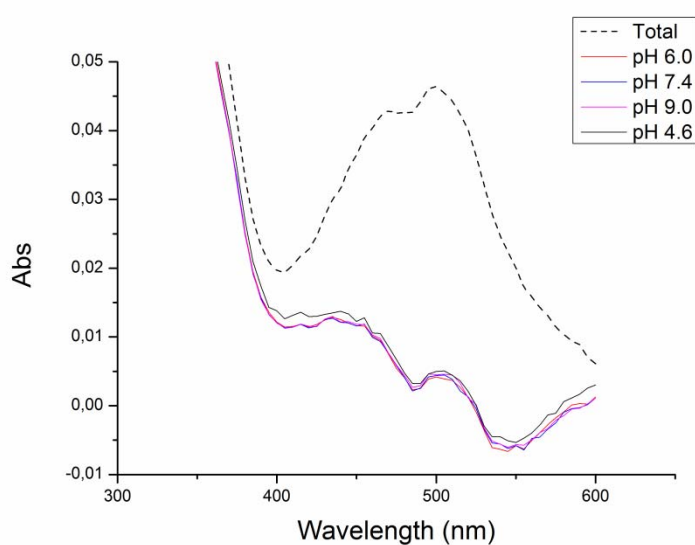

**Figure S3.** UV-Vis spectra of ARS solution before (dotted line) and after (solid lines) being treated with 3 mg of Si@poly(APBA-PA) in 1 mL of buffers at different pH values. Initial ARS concentration was 0.1 mM. Before collecting the spectra, all the solutions were diluted 10 folds with 0.1 M PBS buffer (pH 7.4).
